# Supplementary material for: Sulfonated phenylamine ionic liquids as efficient phase-separation catalysts for the synthesis of trimethylolpropane triacrylate
Source: Royal Society of Chemistry journal article supplement (doi:10.1039/d3nj02346j), 2023-01-01
Supplement: d3nj02346j1.pdf [file d3nj02346j1.pdf]

## Electronic Supplementary Information

# Sulfonated Phenylamine Ionic Liquids as Efficient Phase-Separation Catalysts for Synthesis of Trimethylolpropane Triacrylate

Mingjue Zhang<sup>1</sup>, Shuang Li<sup>2\*</sup>, Pingbo Zhang<sup>2</sup>, Yan Leng<sup>2\*</sup>

1. School of Pharmaceutical and Chemical Engineering, Southeast University Chengxian College, Nanjing 210088, Jiangsu, China

2. The Key Laboratory of Synthetic and Biological Colloids, Ministry of Education, School of Chemical and Material Engineering, Jiangnan University, Wuxi 214122, Jiangsu, China

\*E-mail : [yanleng@jiangnan.edu.cn](mailto:yanleng@jiangnan.edu.cn).

Table S1. Elemental analysis results of the PS<sub>n</sub>-PA

| 样品                  | N(%) | C(%) | H(%) | O(%) | S(%) |
|---------------------|------|------|------|------|------|
| PS <sub>1</sub> -PA | 6.2  | 50.1 | 6.0  | 22.7 | 15.0 |
| PS <sub>2</sub> -PA | 4.1  | 42.9 | 5.7  | 29.3 | 18.0 |
| PS <sub>3</sub> -PA | 3.0  | 39.7 | 5.6  | 31.8 | 19.9 |

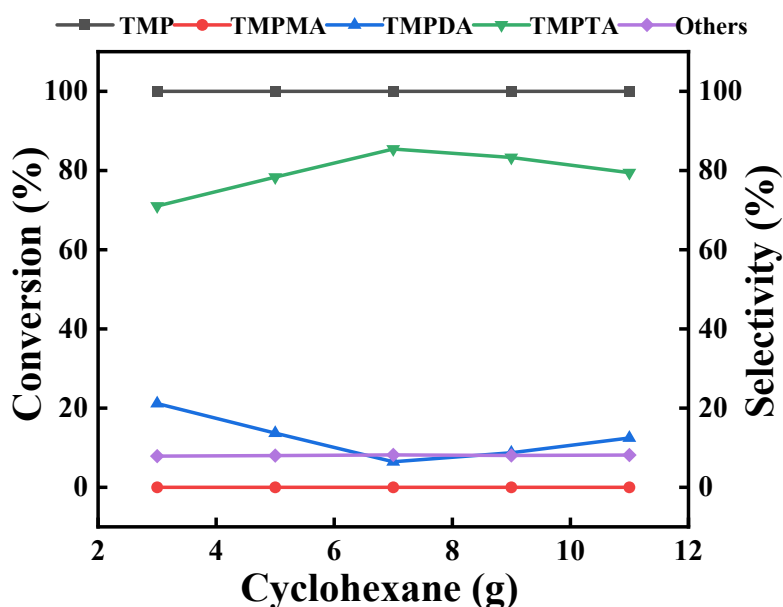

Figure S1. Influence of the amount of water agent towards TMP conversion and TMPTA selectivity

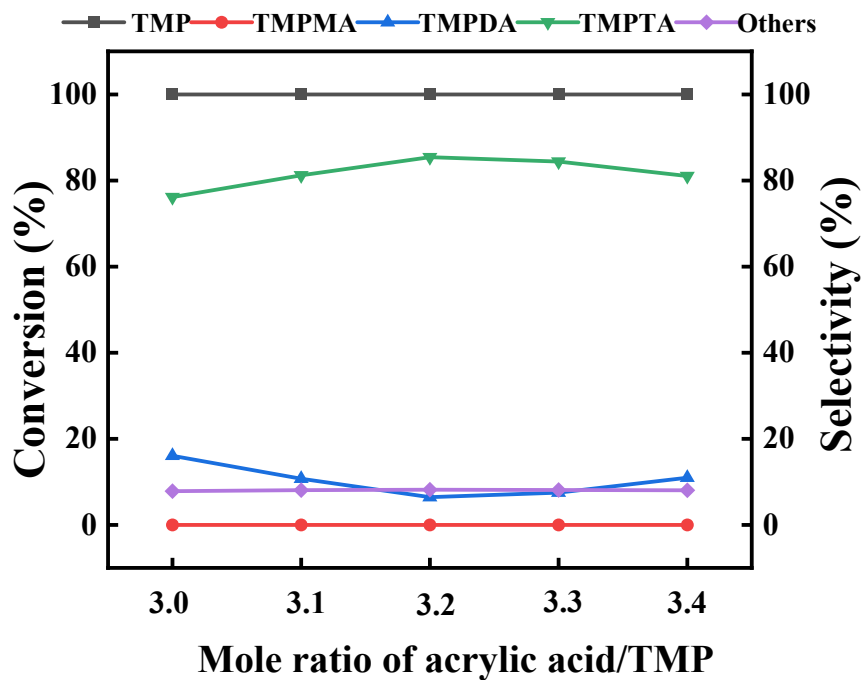

Figure S2. Influence of molar ratio of acrylic acid to TMP towards esterification reaction

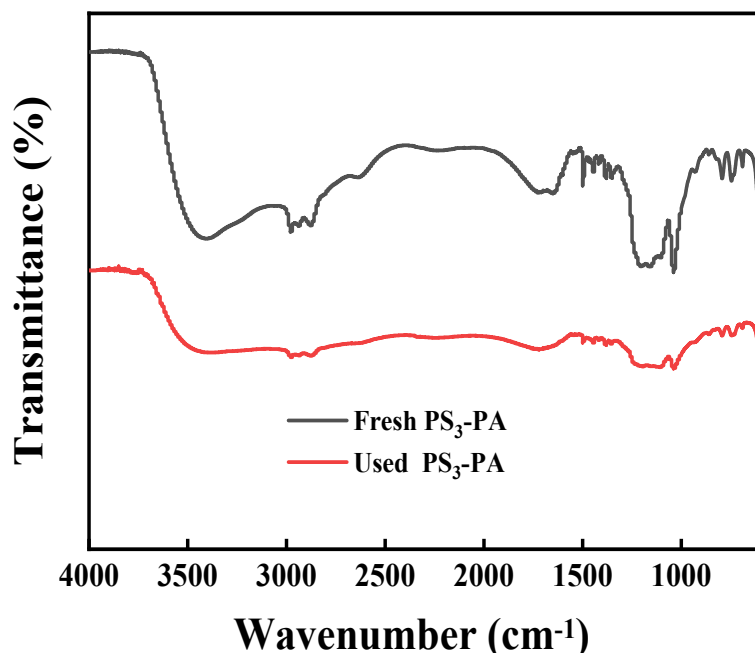

Figure S3. FT-IR spectra for the fresh and recycled PS<sub>3</sub>-PA

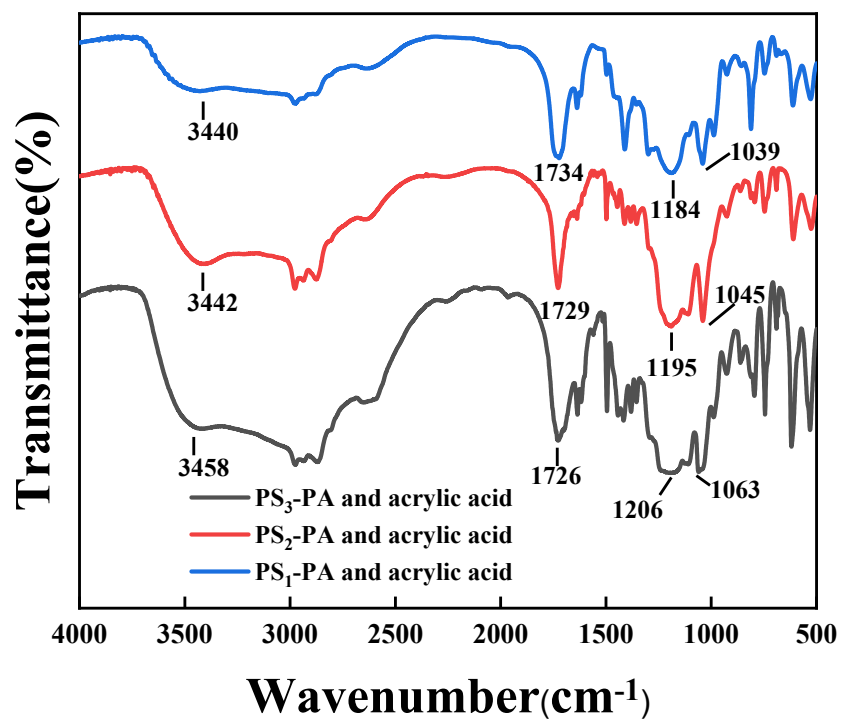

Figure S4. FT-IR spectra for PS<sub>n</sub>-PA and acrylic acid
